# Supplementary material for: Synthesis of face-centred cubic Cs3C60in THF
Source: Royal Society of Chemistry journal article supplement (doi:10.1039/c4fd00085d), 2014-01-01
Supplement: c4fd00085d1.pdf [file c4fd00085d1.pdf]

## Electronic Supplementary Information

### Synthesis of face-centred cubic Cs<sub>3</sub>C<sub>60</sub> in THF

Alec G. McLennan,<sup>a</sup> Alexey Y. Ganin,<sup>a,c</sup> Yasuhiro Takabayashi,<sup>b</sup> Ross H. Colman,<sup>b</sup> Ruth H. Zadik,<sup>b</sup> Matthew J. Rosseinsky<sup>a\*</sup> and Kosmas Prassides<sup>b,d\*</sup>

<sup>a</sup> Department of Chemistry, University of Liverpool, Crown Street, Liverpool L69 7ZD, UK.  
Fax: +44 (0) 151 794 3588; Tel: +44 (0) 151 794 3499; E-mail: m.j.rosseinsky@liverpool.ac.uk

<sup>b</sup> Department of Chemistry, Durham University, South road, Durham DH1 3LE, UK  
E-mail: k.prassides@durham.ac.uk

<sup>c</sup> School of Chemistry, University of Glasgow, Glasgow G12 8QQ, UK.

<sup>d</sup> WPI Research Center, Advanced Institute for Materials Research, Tohoku University, Sendai 980-8577, Japan

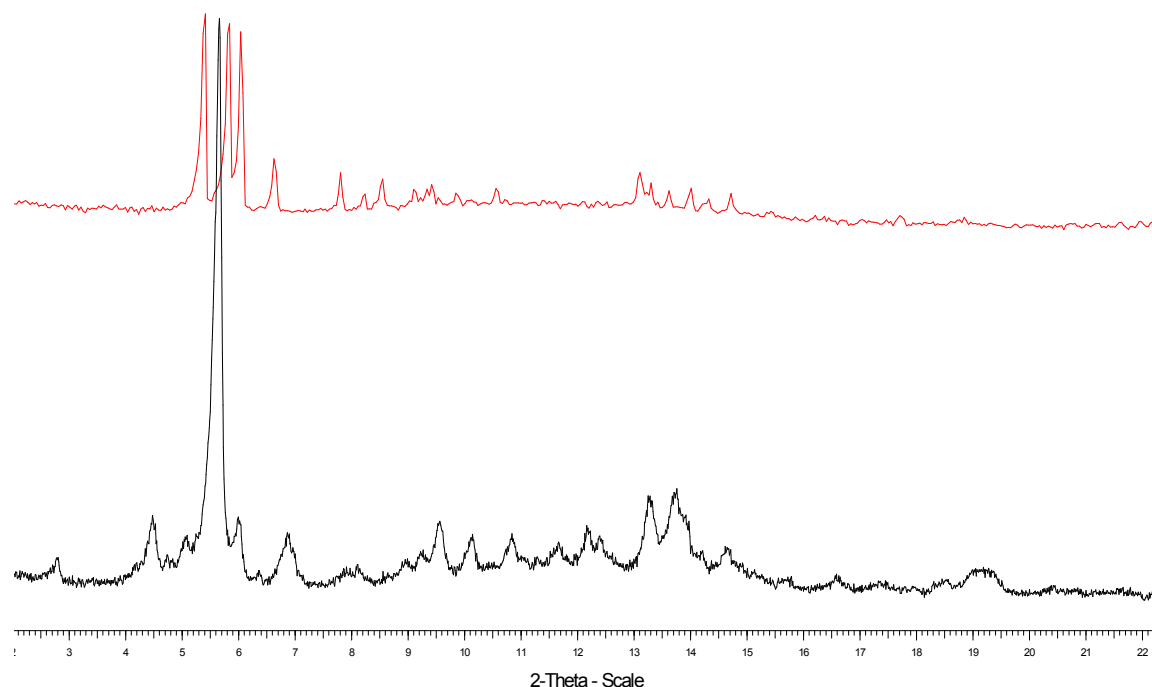

Figure S1 X-ray patterns of Mn(cp\*)<sub>2</sub> (top) and Cs[Mn(cp\*)<sub>2</sub>] (bottom). MoK<sub>α1</sub> radiation (0.7095 Å)

**Table S1.** Refined parameters for the fcc (space group  $Fm\bar{3}m$ )  $Cs_3C_{60}$  (**Sample 1**) obtained from the Rietveld refinement of the synchrotron X-ray powder diffraction data at 295 K. Estimated errors in the last digits are given in parentheses. The weighted-profile and expected  $R$ -factors are  $R_{wp} = 1.14\%$  and  $R_{exp} = 0.24\%$ . The values of the lattice constant and unit cell volume are:  $a = 14.7560(2)$  Å, and  $V/C_{60} = 803.24(3)$  Å<sup>3</sup>. The positions of the C atoms were adopted from the Ref. [1] and kept fixed in the course of the refinement.

|       | $x/a$  | $y/b$  | $z/c$  | $N$      | $B_{iso}$ (Å <sup>2</sup> ) |
|-------|--------|--------|--------|----------|-----------------------------|
| Cs(1) | 0.25   | 0.25   | 0.25   | 0.999(1) | 2.67(2)                     |
| Cs(2) | 0.5    | 0.5    | 0.5    | 0.944(1) | 9.63(7)                     |
| C(1)  | 0      | 0.0491 | 0.2407 | 0.5      | 0.13(8)                     |
| C(2)  | 0.2051 | 0.0767 | 0.0978 | 0.5      | 0.13(8)                     |
| C(3)  | 0.1764 | 0.1533 | 0.0503 | 0.5      | 0.13(8)                     |

**Table S2.** Refined parameters for the fcc (space group  $Fm\bar{3}m$ )  $Cs_3C_{60}$  (**Sample 2**) obtained from the Rietveld refinement of the synchrotron X-ray powder diffraction data at 295 K. Estimated errors in the last digits are given in parentheses. The weighted-profile and expected  $R$ -factors are  $R_{wp} = 1.78\%$  and  $R_{exp} = 0.38\%$ . The values of the lattice constant and unit cell volume are:  $a = 14.7479(2)$  Å, and  $V/C_{60} = 801.92(3)$  Å<sup>3</sup>. The positions of the C atoms were adopted from the Ref. [1] and kept fixed in the course of the refinement.

|       | $x/a$  | $y/b$  | $z/c$  | $N$       | $B_{iso}$ (Å <sup>2</sup> ) |
|-------|--------|--------|--------|-----------|-----------------------------|
| Cs(1) | 0.25   | 0.25   | 0.25   | 0.9859(6) | 2.03(2)                     |
| Cs(2) | 0.5    | 0.5    | 0.5    | 0.975(1)  | 11.32(5)                    |
| C(1)  | 0      | 0.0491 | 0.2407 | 0.5       | 0.56(4)                     |
| C(2)  | 0.2051 | 0.0767 | 0.0978 | 0.5       | 0.56(4)                     |
| C(3)  | 0.1764 | 0.1533 | 0.0503 | 0.5       | 0.56(4)                     |

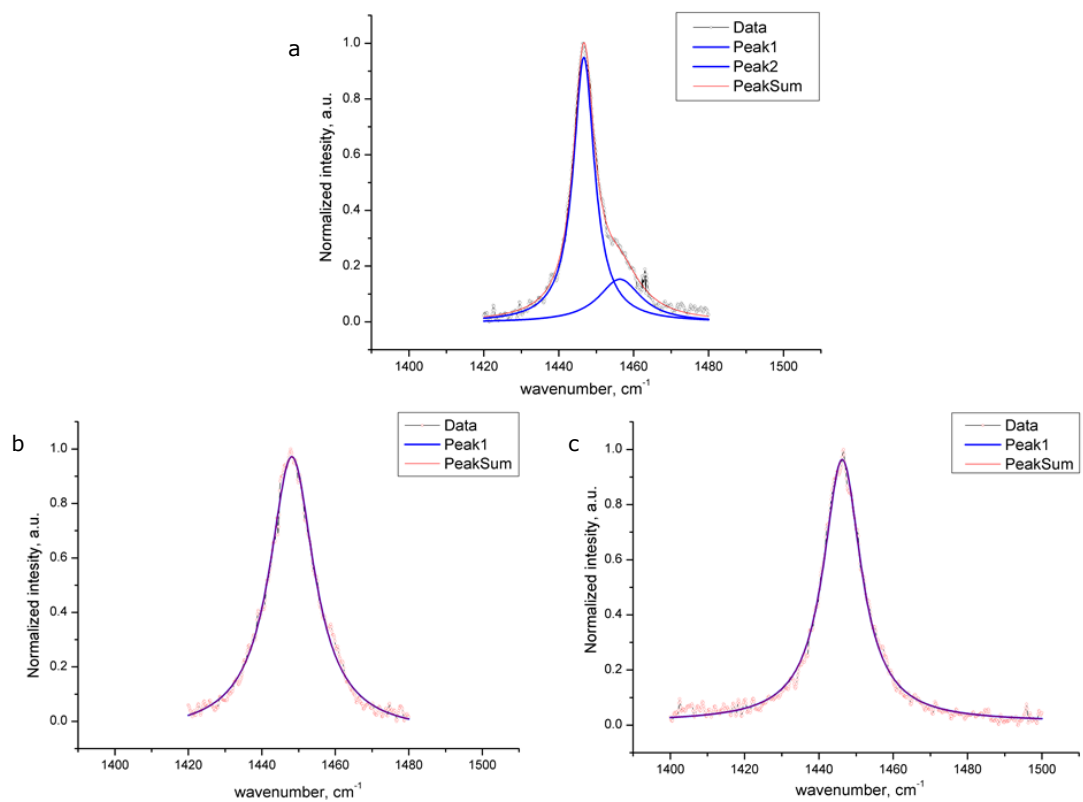

**Figure S2.** Comparison of the Raman spectra and their fit with Lorentzian functions Ref. [1] (a), Sample 1 (b) and Sample 2 (c). The black line/red points correspond to the observed data; the blue line represents the peak contribution to the profile, and the red line shows the overall fit to the data.

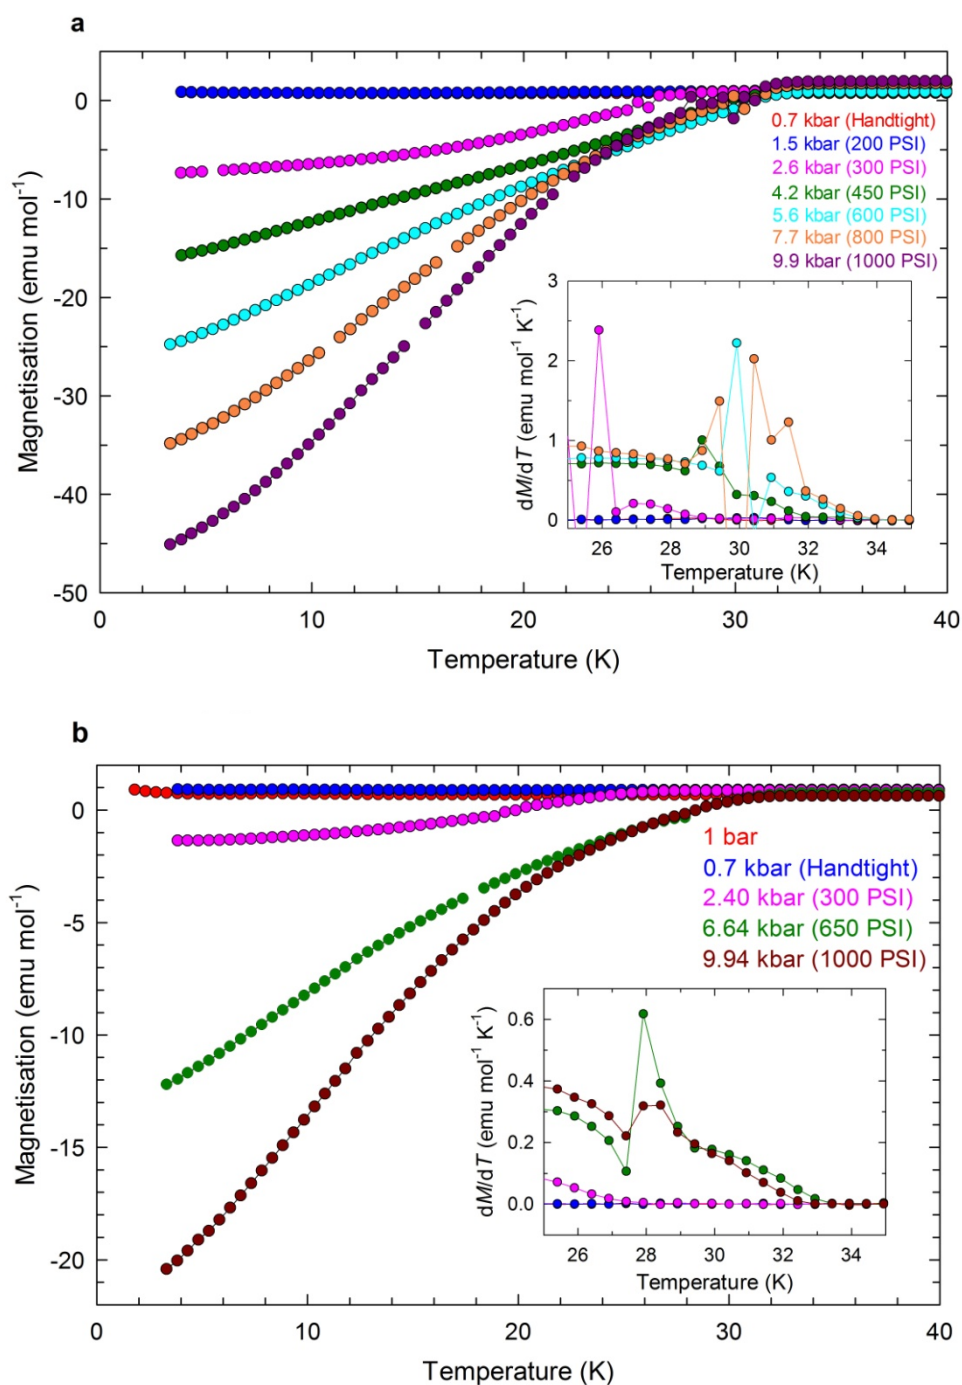

**Figure S3.** High pressure SQUID magnetic measurements and derivative  $dM/dT$  of the respective data. **(a)** Magnetisation as a function of temperature for Sample 1. The onset of superconductivity is at 0.7 kbar with a  $T_c$  of 29.5 K. Maximum shielding fraction of 6 % with a  $T_c$  of 33.5 K achieved at 9.9 kbar. **(b)** The magnetisation as a function of temperature measurements for Sample 2. The onset of superconductivity is at 2.4 K bar with a  $T_c$  of 29.0 K. The shielding fraction rises to a maximum value of 3 % with a  $T_c$  of 33.0 K at 9.9 kbar.

1. A. Y. Ganin, Y. Takabayashi, P. Jeglic, D. Arcon, A. Potocnik, P. J. Baker, Y. Ohishi, M. T. McDonald, M. D. Tzirakis, A. McLennan, G. R. Darling, M. Takata, M. J. Rosseinsky and K. Prassides, *Nature*, 2010, **466**, 221.
